# Supplementary material for: Flash memory based on solution processed hafnium dioxide charge trapping layer
Source: Royal Society of Chemistry journal article supplement (doi:10.1039/c4tc00010b), 2014-01-01
Supplement: c4tc00010b1.pdf [file c4tc00010b1.pdf]

## Supporting Information:

Title: Flash memory based on solution processed hafnium dioxide charge trapping layer

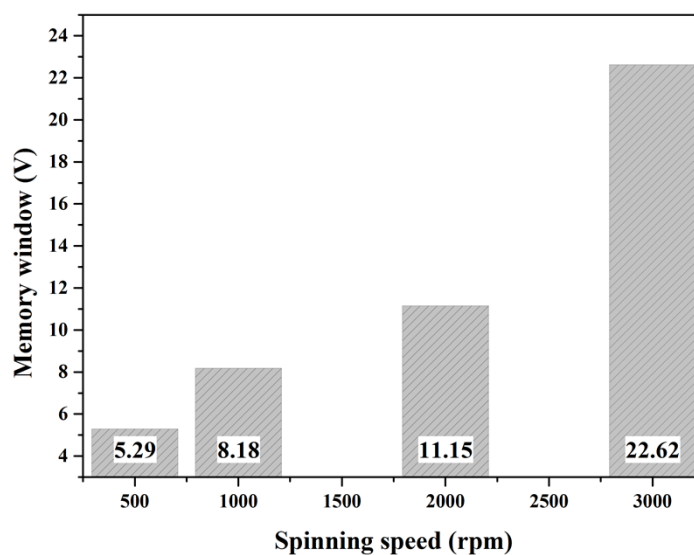

**Fig. S1.** Memory window of devices with HfO<sub>2</sub> layer spin-coated at various spinning speed of 500, 1000, 2000 and 3000 rpm for 30 s, respectively.

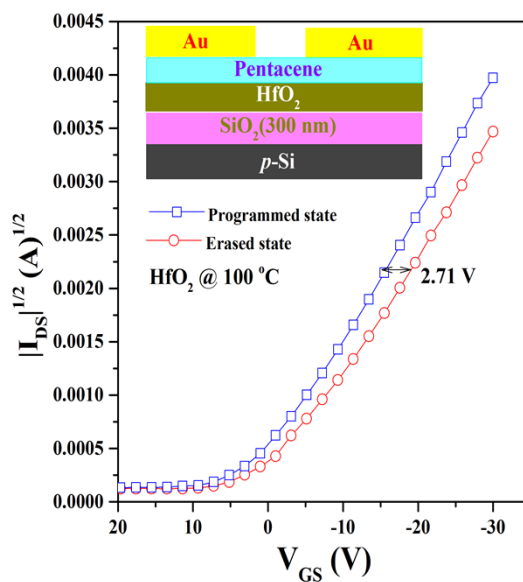

**Fig. S2.** Transfer characteristics of memory devices with HfO<sub>2</sub> spin-coated at 3000 rpm and annealed at 100 °C on Si wafer with 300 nm SiO<sub>2</sub> and the program and erase voltages are +60 V and -60 V for 5 s, respectively.

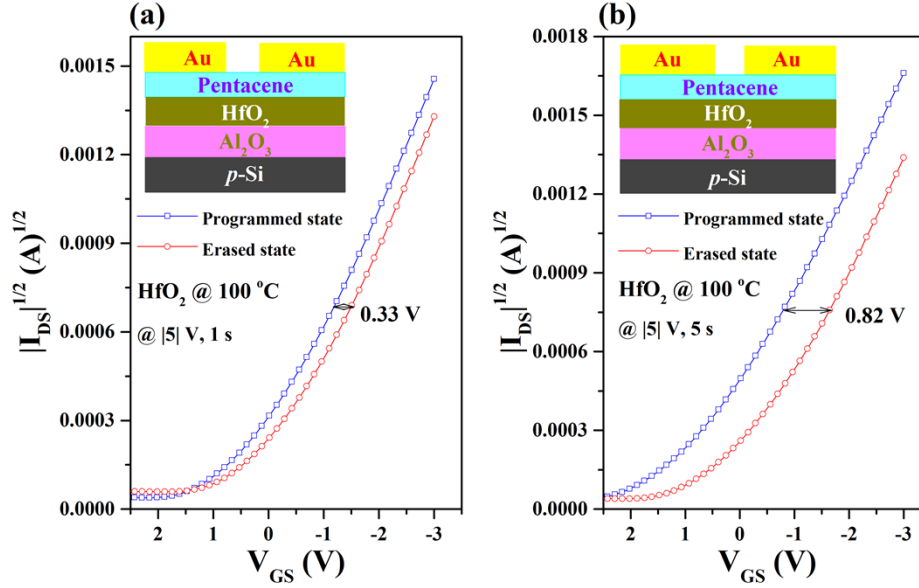

**Fig. S3.** Transfer characteristics of memory devices with HfO<sub>2</sub> spin-coated at 3000 rpm and annealed at 100 °C on Si wafer with 25 nm Al<sub>2</sub>O<sub>3</sub> and the program and erase voltages are +5 V and -5 V for 1 s (a) and (b) 5 s, respectively.

Table S1. Comparison of charge retention performance of devices with HfO<sub>2</sub> prepared by solution process and deposition method.

| References                                               | Remained memory window percentage after 10 <sup>4</sup> s | HfO <sub>2</sub> preparation method |
|----------------------------------------------------------|-----------------------------------------------------------|-------------------------------------|
| Our study                                                | 57.5 %                                                    | Sol-gel and spin-coating            |
| Thin Solid Films, 2010, 518, 6460-6464.                  | 53.3 %~ 84.9 %                                            | Atomic layer deposition             |
| Semiconductor Science and Technology, 2007, 22, 884-889. | 57.1 %                                                    | Atomic layer deposition             |

Table S2. Comparison of operation voltage of devices with solution processed HfO<sub>2</sub> on SiO<sub>2</sub> and other polymer charge trapping elements.

| References                                         | Operation voltage | Memory window |
|----------------------------------------------------|-------------------|---------------|
| Our study (control layer, SiO <sub>2</sub> )       | +70/-70 V         | 29.85 V       |
|                                                    | +80/-80 V         | 32.32 V       |
| Advanced Functional Materials, 2008, 18, 3678-3685 | +70/-70 V         | 25~30 V       |
| Applied Physics Letters, 2010, 96, 033302.         | +80/-80 V         | ~ 34 V        |
